# Supplementary material
Source: PubMed Central journal article supplement (PMC8617142)
Supplement: 40201_2021_711_MOESM1_ESM.pdf [file 40201_2021_711_MOESM1_ESM.pdf]

1 **Mercury horizontal spatial distributions in paddy field/rice and their influencing**  
2 **factors in a typical mining area, Guizhou**

3  
4 Jingjing Du<sup>1,2</sup> • Fang Liu<sup>1</sup> • Ling Zhao<sup>2</sup> • Chong Liu<sup>1,2</sup> • Zhaocong Fu<sup>2</sup> • Ying Teng<sup>2</sup>

5 <sup>1</sup>College of Resource and Environmental Engineering, Guizhou University, Guiyang 550025,  
6 China.

7 <sup>2</sup>Key Laboratory of Soil Environment and Pollution Remediation, Institute of Soil Science,  
8 Chinese Academy of Sciences, Nanjing 210008, China; University of Chinese Academy of  
9 Sciences, Beijing 100049, China.

10 E-mail: yteng@issas.ac.cn (Y. Teng)

11  
12 **Supplementary materials**

13 **Tables**

14 Table S1 THg contents in irrigation water in the study area

15 **Figures**

16 Fig. S1 Soil profiles in the study area

17 Fig. S2 Relationships of Alkaline hydrolysis nitrogen (N) and effective sulfur (S) with organic  
18 matter (OM) in paddy soils

19 Fig. S3 The correlations of Hg contents in paddy soil with Pb (a), Cu (b), Fe (c), Zn (d) and  
20 Cr (e).

21  
22  
23  
24  
25  
26  
27  
28  
29  
30  
31  
32  
33  
34  
35  
36  
37  
38  
39  
40  
41  
42  
43  
44

45 **Table S1 THg contents in irrigation water in the study area**

| Sample                  | THg (ng/L) | Date      |
|-------------------------|------------|-----------|
| 1<br>(Mountain streams) | 6.2        | 2019-5-30 |
|                         | 12.3       | 2019-6-22 |
|                         | 20.4       | 2019-7-28 |
| 2                       | 87.1       | 2019-5-30 |
|                         | 121.3      | 2019-6-22 |
|                         | 27.5       | 2019-7-28 |
|                         | 69.1       | 2019-8-15 |
| 3                       | 51.5       | 2019-5-30 |
|                         | 66.9       | 2019-6-22 |
|                         | 23.6       | 2019-7-28 |
|                         | 25.2       | 2019-8-15 |
| 4                       | 76.4       | 2019-5-31 |
|                         | 38.7       | 2019-6-22 |
|                         | 142.5      | 2019-7-28 |
|                         | 181.4      | 2019-8-15 |
| 5                       | 88.2       | 2019-5-31 |
|                         | 34.6       | 2019-7-28 |
|                         | 108.8      | 2019-8-15 |
| 6                       | 125.9      | 2019-5-31 |
|                         | 95.6       | 2019-6-22 |
|                         | 10.2       | 2019-7-28 |
|                         | 31.6       | 2019-8-15 |
| 7                       | 44.8       | 2019-5-31 |
|                         | 24.6       | 2019-6-22 |
|                         | 8.1        | 2019-7-28 |
|                         | 11.4       | 2019-8-15 |
| 8<br>(Mountain streams) | 1.3        | 2019-5-30 |
|                         | 28.9       | 2019-7-28 |
|                         | 30.0       | 2019-8-15 |
| 9                       | 76.4       | 2019-5-30 |
|                         | 31.6       | 2019-7-28 |
| 10                      | 374.0      | 2019-4-29 |
|                         | 15.0       | 2019-7-28 |
|                         | 31.9       | 2019-8-15 |
| Min (n = 31)            | 1.3        |           |
| Max (n = 31)            | 374.0      |           |
| Mean±S.D (n = 31)       | 62.4±70.5  |           |

46

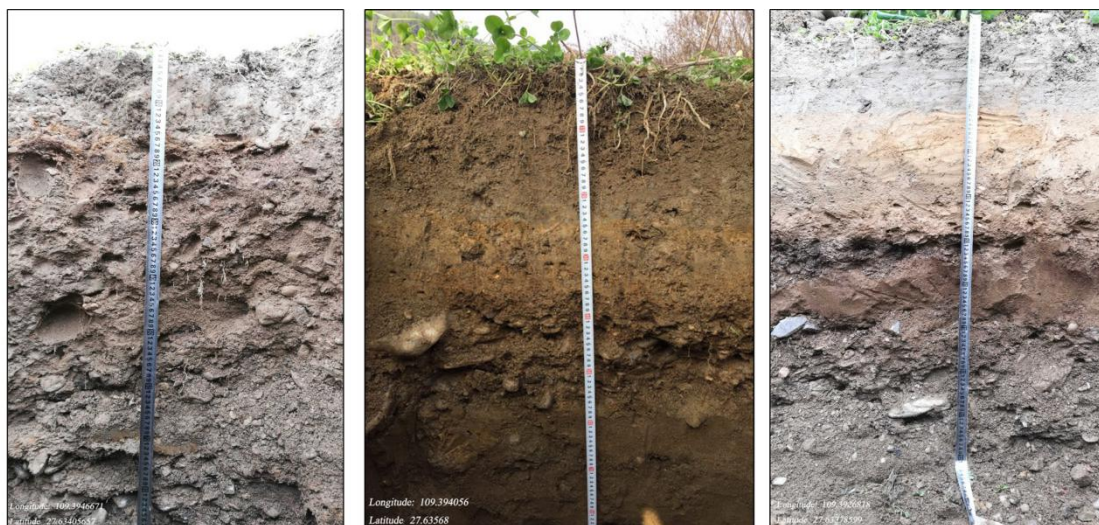

Fig. S1 Soil profiles in the study area

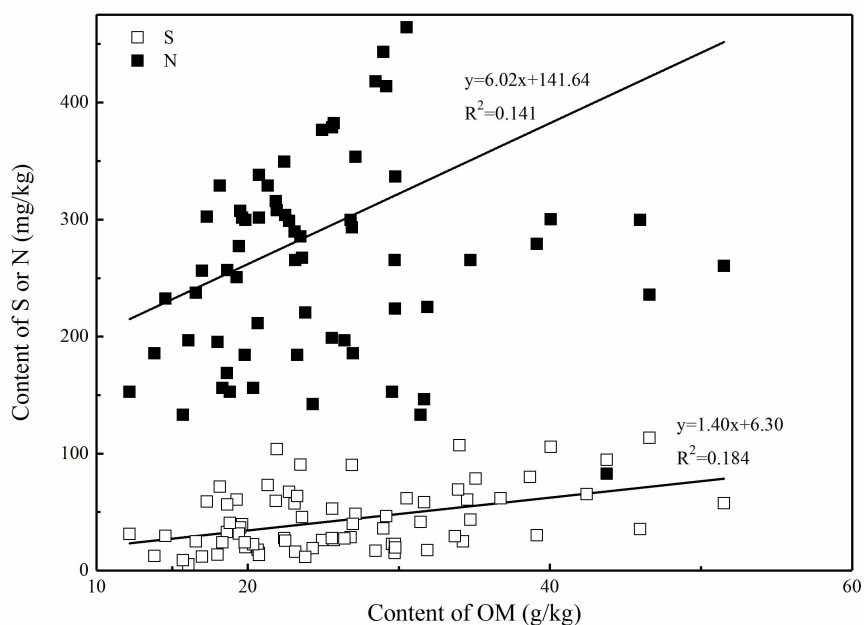

Fig. S2 Relationships of Alkaline hydrolysis nitrogen (N) and effective sulfur (S) with organic matter (OM) in paddy soils

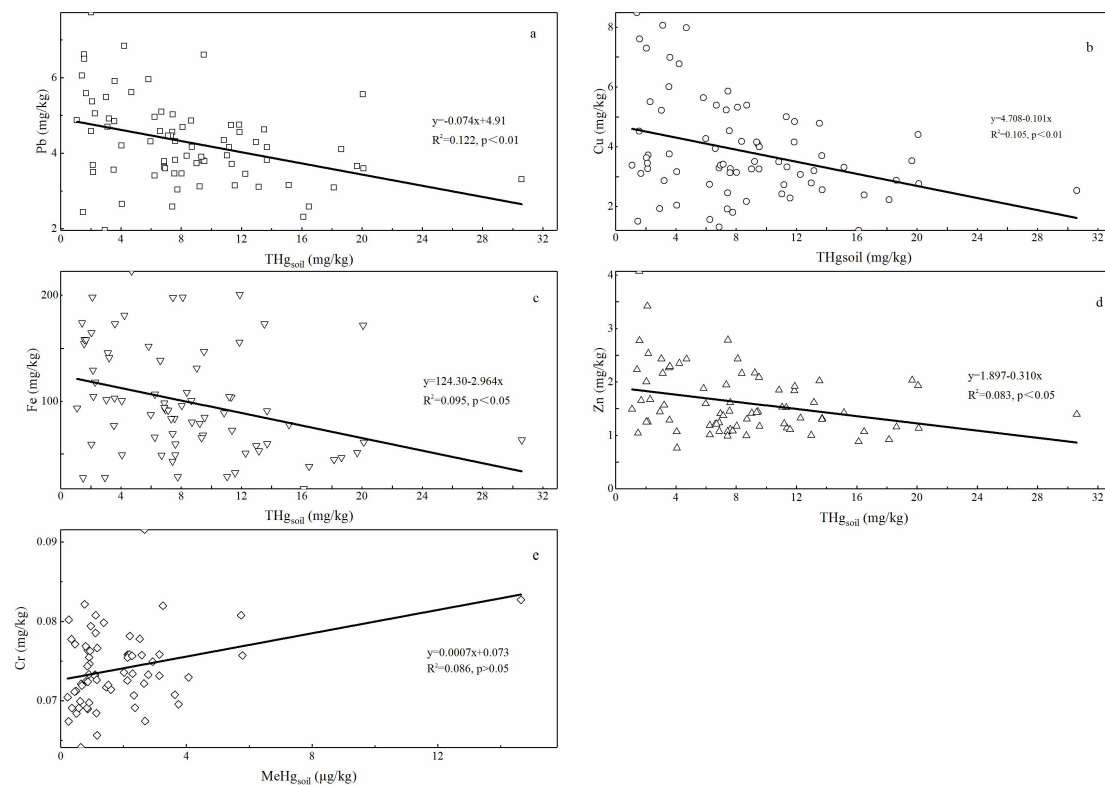

**Fig. S3** The correlations of Hg contents in paddy soil with Pb (a), Cu (b), Fe (c), Zn (d) and Cr (e)
